# Supplementary material for: Competition and Habitat Quality Influence Age and Sex Distribution in Wintering Rusty Blackbirds
Source: PLoS One. 2015 May 6;10(5):e0123775. doi: 10.1371/journal.pone.0123775 (PMC4422684; doi:10.1371/journal.pone.0123775)
Supplement: S1 Table — (XLS) [file pone.0123775.s001.xls]

## Sheet: PLOS_Capture_data
Location	Habitat	Year	Day	Time	Sex	Age	Bandno	Fat_total	pectoral_muscle	Tarsus	Winglength	Bodymass
1	3	1	2005-12-30	3:30PM	2	2	92244131	1	#NULL!	29.1	108	53.6
1	3	1	2005-12-31	8:30AM	2	2	92244132	1.5	#NULL!	28.5	106	55.2
1	3	1	2005-12-31	9:50AM	2	1	92244133	2.25	#NULL!	30.1	109.5	53.8
1	3	1	2005-12-31	9:50AM	2	2	92244134	2	#NULL!	30.7	108.5	56.5
1	3	1	2005-12-31	12:50PM	2	2	92244135	2	#NULL!	30.9	111.5	55.2
1	3	1	2005-12-31	2:15PM	2	2	92244136	2	#NULL!	29.8	110	59.7
1	3	1	2006-01-03	8:00AM	1	2	92244137	1.75	#NULL!	30	117.8	62.2
1	3	1	2006-01-03	8:00AM	2	2	92244138	1	#NULL!	29	112	52.3
1	3	1	2006-01-03	8:00AM	2	2	92244139	0.25	#NULL!	29.9	108	53.3
1	3	1	2006-01-03	8:00AM	1	2	92244140	0	#NULL!	31.9	118.5	57.9
1	3	1	2006-01-03	8:00AM	2	1	92244141	0.5	#NULL!	30	113.5	53
1	3	1	2006-01-06	8:00AM	2	1	92244142	1.25	#NULL!	29.8	107.9	52.9
1	3	1	2006-01-07	9:31AM	2	1	92244143	1.5	#NULL!	28.7	107.5	53.8
1	3	1	2006-01-09	8:00AM	2	1	92244144	2.75	#NULL!	27.8	108	53.4
2	2	1	2006-01-10	7:30AM	1	1	92244145	1.5	#NULL!	28.2	119.5	60.4
2	2	1	2006-01-10	7:30AM	1	1	92244146	1.75	#NULL!	30.9	112	63.4
2	2	1	2006-01-10	7:30AM	2	2	92244147	1	#NULL!	29.5	111	55
2	2	1	2006-01-10	7:45AM	1	1	92244148	2	#NULL!	29.9	117.5	61.6
2	2	1	2006-01-10	7:45AM	1	1	92244149	2	#NULL!	30	117.5	61.7
2	2	1	2006-01-10	8:00AM	1	1	92244150	2.5	#NULL!	28.9	113.5	57.5
2	2	1	2006-01-10	8:25AM	2	1	92244151	1.5	#NULL!	30	105	50.5
2	2	1	2006-01-10	8:45AM	1	1	92244152	1.5	#NULL!	32	118	60.1
2	2	1	2006-01-14	7:42AM	1	1	92244153	1.75	#NULL!	31	117.5	62.1
2	2	1	2006-01-14	8:14AM	1	1	92244154	1.5	#NULL!	30.1	115.5	60.5
2	2	1	2006-01-14	8:14AM	1	1	92244155	1.5	#NULL!	30.9	115	61.5
2	2	1	2006-01-14	8:30AM	1	1	92244156	1.25	#NULL!	31.1	118	64.5
2	2	1	2006-01-14	9:10AM	2	1	92244157	0.5	#NULL!	29.8	111	59.8
1	3	1	2006-01-15	8:00AM	2	1	92244158	1	#NULL!	29.7	109	53.3
2	2	1	2006-01-21	7:35AM	2	1	92244159	0.5	#NULL!	29.1	109	47
2	2	1	2006-01-21	7:50AM	1	1	92244160	0	#NULL!	30.9	116.5	59.5
1	3	1	2006-01-25	7:30AM	2	2	92244161	2	#NULL!	29.8	105.5	56.3
1	3	1	2006-01-25	7:45AM	2	2	92244162	1.5	#NULL!	30.1	109	51.6
1	3	1	2006-01-25	7:45AM	2	2	92244163	3	#NULL!	30.5	114.5	59
1	3	1	2006-01-25	8:00AM	2	2	92244164	0.5	#NULL!	28.8	107.5	48.4
2	2	1	2006-01-27	7:30AM	1	1	92244165	2.5	#NULL!	30.1	113.5	66.3
1	3	1	2006-01-28	7:35AM	2	2	92244166	1.5	#NULL!	29.1	107.5	50.6
1	3	1	2006-01-28	7:45AM	2	1	92244167	1.5	#NULL!	28.7	111.5	49.9
1	3	1	2006-01-28	9:35AM	1	1	92244168	1.75	#NULL!	32	118.5	62.8
2	2	1	2006-02-01	7:40AM	1	1	92244169	1.5	#NULL!	31.8	119.5	63.1
1	3	1	2006-02-09	7:15AM	2	2	92244170	0.5	#NULL!	28	107.5	50.9
2	2	1	2006-02-10	7:22AM	1	1	92244171	1.5	#NULL!	31.1	114	61.2
1	3	1	2006-02-12	6:58AM	1	2	92244172	0	#NULL!	32.1	118	63.3
1	3	1	2006-02-12	8:00AM	1	2	92244173	1	#NULL!	30.1	112	54.6
1	3	1	2006-02-22	8:42AM	1	1	92244174	1	#NULL!	32.1	117.5	64.1
3	1	1	2006-02-27	6:50AM	1	2	92244175	1.5	#NULL!	31.8	120.5	67.2
3	1	1	2006-02-27	6:50AM	2	2	92244176	1	#NULL!	29	106.5	46.7
3	1	1	2006-02-27	7:15AM	1	2	92244177	1.5	#NULL!	30.4	113.5	64.8
3	1	1	2006-02-27	7:30AM	2	2	92244178	1.5	#NULL!	30.4	109	54.1
3	1	1	2006-02-27	8:00AM	1	2	92244179	2.25	#NULL!	31.1	117.5	61.9
3	1	1	2006-02-27	8:00AM	2	2	92244180	3	#NULL!	27.9	108.5	51.9
3	1	1	2006-03-04	6:30AM	2	2	92244181	2	#NULL!	28.8	110	54.1
3	1	1	2006-03-04	6:30AM	2	2	92244182	1.5	#NULL!	29.1	107	51.1
4	3	1	2006-02-14		2	2	122252259	#NULL!	#NULL!	#NULL!	109	54.1
4	3	1	2006-02-14		2	1	122252371	#NULL!	#NULL!	#NULL!	103	50
4	3	1	2006-02-14		2	2	122252372	#NULL!	#NULL!	#NULL!	105	51
4	3	1	2006-02-14		2	2	122252373	#NULL!	#NULL!	#NULL!	105	51.9
4	3	1	2006-02-14		2	2	122252374	#NULL!	#NULL!	#NULL!	107	53.1
4	3	1	2006-02-14		2	1	122252375	#NULL!	#NULL!	#NULL!	105	49.8
4	3	1	2006-02-14		2	2	122252376	#NULL!	#NULL!	#NULL!	102	51.8
4	3	1	2006-02-21		2	2	122252379	#NULL!	#NULL!	#NULL!	109	51.7
4	3	1	2006-02-21		2	2	122252380	#NULL!	#NULL!	#NULL!	107	53.3
4	3	1	2006-02-21		2	1	122252381	#NULL!	#NULL!	#NULL!	117	65.1
4	3	1	2006-02-21		2	1	122252260	#NULL!	#NULL!	#NULL!	#NULL!	#NULL!
4	3	1	2006-02-21		2	2	122255262	#NULL!	#NULL!	#NULL!	#NULL!	#NULL!
4	3	1	2006-02-21		2	2	122252263	#NULL!	#NULL!	#NULL!	#NULL!	#NULL!
4	3	1	2006-02-21		2	2	122252264	#NULL!	#NULL!	#NULL!	#NULL!	#NULL!
5	1	1	2006-02-01	7:45AM	1	2	92244251	1.5	#NULL!	29	113	63.5
5	1	1	2006-02-02	8:15AM	2	2	92244252	1	#NULL!	24.5	107	48.2
5	1	1	2006-02-02	9:20AM	2	2	92244253	1	#NULL!	26.9	109	50.4
5	1	1	2006-02-03	9:00AM	2	2	92244254	2	#NULL!	25.5	108	56.3
5	1	1	2006-02-04	9:14AM	1	2	92244255	2	#NULL!	27	115	65
5	1	1	2006-02-04	9:31AM	1	2	92244256	1.5	#NULL!	29	125	65.2
5	1	1	2006-02-05	9:31AM	1	2	92244257	2	#NULL!	28	113	61.2
2	2	1	2007-01-20	7:10AM	1	2	92244208	1.5	5.22	32.53	121	64.2
2	2	2	2006-12-23	7:30AM	1	2	92244183	1	3.85	32.11	115	62.9
2	2	2	2006-12-23	7:30AM	1	1	92244184	0.5	4.47	29.62	115	59
2	2	2	2006-12-23	7:30AM	1	2	92244185	1.75	4.77	30.56	114.5	61.2
2	2	2	2006-12-23	7:30AM	2	2	92244186	1	5.74	30.08	108	51.7
2	2	2	2006-12-23	7:50AM	1	1	92244187	1	4.9	30.66	112	61.1
2	2	2	2006-12-23	7:50AM	2	1	92244188	0.5	4.58	29.13	109	51.2
2	2	2	2006-12-23	7:50AM	1	1	92244189	2.5	5.15	30.55	114.5	59.5
2	2	2	2006-12-23	7:50AM	1	1	92244190	0	5.3	29.65	117	59.4
2	2	2	2006-12-23	7:50AM	2	1	92244191	0	3.91	30.55	104.5	50.2
2	2	2	2006-12-23	7:50AM	2	2	92244192	0.5	5.94	29.38	107.5	53
2	2	2	2006-12-26	7:07AM	1	2	92244193	2.25	3.21	32.01	117	65.6
2	2	2	2007-01-06	7:14AM	1	2	92244195	2.25	5.02	32.26	114	63.5
2	2	2	2007-01-06	7:14AM	1	1	92244196	1	3.95	28.65	118	59.4
2	2	2	2007-01-06	7:14AM	2	2	92244197	2.5	4.75	30.04	101	50.6
2	2	2	2007-01-06	7:14AM	2	2	92244198	1.5	2.56	27.43	104	47.7
2	2	2	2007-01-06	7:40AM	2	2	92244199	1	4.66	29.59	108	51.6
2	2	2	2007-01-06	8:15AM	1	1	92244200	2	3.96	31.16	113	63.8
2	2	2	2007-01-06	8:15AM	1	2	92244201	2	3.9	29.8	113	59.9
2	2	2	2007-01-20	7:15AM	1	2	92244209	2.25	4.83	30.62	111	61.9
2	2	2	2007-01-20	7:15AM	1	2	92244210	1.25	3.62	30.37	114	62.6
2	2	2	2007-01-20	7:15AM	2	1	92244211	1.25	4.28	29.15	109.5	51.6
2	2	2	2007-01-20	7:30AM	2	2	92244212	1	3.62	29.75	109	53.5
2	2	2	2007-01-26	7:09AM	2	2	92244215	2.5	1.86	29.94	105	54.3
2	2	2	2007-01-26	8:27AM	1	1	92244217	2	1.94	32.7	115	65.9
2	2	2	2007-01-26	8:35AM	2	2	92244218	2.25	3.69	29.28	106	51.9
3	1	2	2007-01-17	7:45AM	1	2	92244203	1.5	4.47	20.82	117.5	59.8
3	1	2	2007-01-17	7:45AM	1	2	92244204	1	6.12	29.77	113.5	57.3
3	1	2	2007-01-17	8:14AM	2	2	92244205	2.75	4.39	30.08	107	62.2
3	1	2	2007-01-17	8:14AM	1	2	92244206	3	4.31	31.31	116.5	64.6
3	1	2	2007-01-17	9:00AM	1	2	92244207	1.75	4.88	32.06	118	63.5
3	1	2	2007-01-22	8:23AM	1	2	92244213	1.25	4.59	30.25	115	61.4
3	1	2	2007-01-22	8:50AM	1	2	92244214	2.25	3.6	30.82	114	64.9
3	1	2	2007-02-03	6:55AM	2	2	92244219	2.25	4.82	29.36	109	52.8
3	1	2	2007-02-03	8:00AM	1	2	92244220	3.5	6.16	30.87	113	59.4
4	3	2	2007-02-12		2	2	122252391	#NULL!	#NULL!	#NULL!	105	53.8
4	3	2	2007-02-12		2	1	122252392	#NULL!	#NULL!	#NULL!	103	51.3
4	3	2	2007-02-12		2	2	122252393	#NULL!	#NULL!	#NULL!	105	52.5
4	3	2	2007-02-12		2	2	122252394	#NULL!	#NULL!	#NULL!	105	54.3
4	3	2	2007-02-12		2	2	122252395	#NULL!	#NULL!	#NULL!	108	53.4
4	3	2	2007-02-19		2	2	122252297	#NULL!	#NULL!	#NULL!	109	48.8
6	2	2	2007-01-04	7:50AM	2	2	92244194	0.75	1.75	30.77	110.5	52.8
6	2	2	2007-01-15	8:05AM	1	2	92244202	1.75	3.66	31.18	118	61.8
6	2	2	2007-02-18	6:40AM	2	2	92244233	1	5.66	30.02	113	51.4
6	2	2	2007-02-18	6:45AM	1	2	92244234	1.25	4.27	30.62	115	61.5
6	2	2	2007-02-18	6:51AM	1	2	92244235	1.25	4.9	30.5	116	58.6
6	2	2	2007-02-18	7:50AM	1	2	92244236	1.75	4.71	30.32	112	61.8
6	2	2	2007-02-18	7:02AM	2	2	92244237	2.25	4.43	29.08	105.5	56.3
6	2	2	2007-03-06	6:57AM	2	2	69225001	1.5	3.58	30.48	107	52.7
6	2	2	2007-03-06	8:10AM	1	1	69225002	1	3.86	32.19	119.5	65.4
7	1	2	2007-02-05	7:15AM	1	2	92244221	2.25	4.28	30.78	114	62.4
7	1	2	2007-02-05	7:15AM	1	2	92244222	1.5	6.49	32.1	121	62.6
7	1	2	2007-02-05	7:17AM	1	2	92244223	1.5	4.63	32.58	119	64.9
7	1	2	2007-02-05	7:20AM	1	2	92244224	2	5.24	30.14	117	64.5
7	1	2	2007-02-05	7:50AM	2	2	92244225	1	5.45	30.41	111	56.7
7	1	2	2007-02-22	6:50AM	1	1	92244238	2.25	2.7	31.4	118	65.6
7	1	2	2007-03-06	6:00AM	1	1	92244245	1	3.87	30.74	114	64.9
9	3	2	2007-02-11	6:50AM	2	2	92244226	2.5	2.21	29.47	104	52.6
9	3	2	2007-02-11	6:53AM	1	2	92244227	1.75	3.01	31.82	112.5	66.1
9	3	2	2007-02-11	6:57AM	1	2	92244228	1.5	4.54	31.45	112	59.4
9	3	2	2007-02-11	7:04AM	2	2	92244229	1.75	4.4	29.24	109	57.1
9	3	2	2007-02-11	7:11AM	1	1	92244230	2.25	4.08	31.82	113	61.1
9	3	2	2007-02-16	6:45AM	1	2	92244231	2.5	4.99	31.11	117	61.8
9	3	2	2007-02-16	6:55AM	2	2	92244232	0.5	5.91	28.85	109.5	48.4
9	3	2	2007-02-27	6:53AM	2	2	92244242	1	3.76	29.92	108	52.1
9	3	2	2007-03-07	6:35AM	1	1	69225003	0.5	4.95	31.67	119	61
9	3	2	2007-03-07	6:35AM	2	1	69225004	1.5	2.17	29.07	107	50.9
9	3	2	2007-03-21	6:30AM	2	2	69225005	1.75	4.74	30.68	107.5	54.9
9	3	2	2007-03-21	6:57AM	2	2	92244246	0.75	5.2	28.88	105	48.7
9	3	2	2007-03-21	7:45AM	2	2	92244247	1	5.7	29.19	104.5	46.7
10	3	2	2007-02-23	6:48AM	1	2	92244239	2.25	2.52	31.9	113.5	62.6
10	3	2	2007-03-02	6:55AM	2	1	92244243	1.5	2.36	30.26	107	49.9
10	3	2	2007-03-02	7:25AM	2	2	92244244	1.5	5.37	30.03	109	52.5
11	2	2	2007-02-25	7:01AM	1	2	92244240	1	4.89	31.17	118	64.7
11	2	2	2007-02-25	7:07AM	1	2	92244241	2	2.95	30.87	119	68.6
2	2	3	2007-12-25	7:20AM	1	1	69225051	1.75	2.65	32.48	117	68.2
2	2	3	2008-01-03	7:15AM	2	2	69225052	1	4.08	28.37	103	50.4
2	2	3	2008-01-11	7:07AM	2	2	69225057	1	4.01	28.31	107.5	53
2	2	3	2008-01-11	7:30AM	1	2	69225058	1	3.21	30.66	111	65.7
2	2	3	2008-01-11	7:55AM	1	2	69225059	1.5	4.03	30.24	119.5	62.3
2	2	3	2008-01-11	8:10AM	2	2	69225060	1.25	3.27	30.83	109	58.5
2	2	3	2008-01-27	6:58AM	2	1	69225024	0.5	4.39	29.2	105	52.2
12	3	3	2008-01-27	11:50AM	1	1	69225025	5	4.05	31.75	118	67.6
12	3	3	2008-02-15	7:30AM	1	2	69225034	0.75	3.39	32.02	121	64.7
12	3	3	2008-02-15	7:30AM	2	1	69225035	0.5	3.44	29.49	105	53.9
12	3	3	2008-02-15	7:45AM	2	1	69225036	0	4.96	30.1	107.5	55.4
12	3	3	2008-02-15	7:45AM	1	2	69225037	0.5	4.1	29.52	115	55.5
12	3	3	2008-03-01	7:15AM	2	1	69225063	0.25	4.52	30.61	103	50.6
12	3	3	2008-03-01	7:15AM	2	2	69225064	1.25	3.6	29.32	109	54.8
13	1	3	2008-01-04	7:20AM	2	2	69225008	1.5	4.03	29.97	110.5	52.3
13	1	3	2008-01-04	8:56AM	2	2	69225053	1.5	4.17	29.47	104	55.2
13	1	3	2008-01-11	7:15AM	2	2	69225015	1	4.23	30.95	113	54.3
13	1	3	2008-01-11	7:20AM	1	2	69225016	0.25	2.73	30.82	114	57.1
13	1	3	2008-01-11	7:30AM	1	2	69225017	1	3.81	30.35	113	58.6
13	1	3	2008-01-11	8:10AM	1	2	69225018	0.5	3.96	30.89	115	63.9
13	1	3	2008-02-02	7:00AM	1	2	69225028	0.75	3.87	31.7	121	63.7
13	1	3	2008-02-02	7:10AM	2	2	69225027	0.5	3.28	29.9	105	50.6
13	1	3	2008-02-02	7:15AM	1	2	69225026	0.5	3.9	29.14	111	59.6
13	1	3	2008-02-02	7:15AM	1	2	69225029	1.25	4.11	29.49	112	55.2
14	2	3	2007-12-30	7:50AM	2	1	69225006	#NULL!	2.01	30.08	107	53
14	2	3	2007-12-30	7:55AM	1	1	69225007	2.25	3.79	31.87	117	63.1
14	2	3	2008-01-09	8:40AM	1	1	69225009	0	#NULL!	30.15	112	61.4
14	2	3	2008-01-09	8:40AM	2	2	69225010	2.25	#NULL!	29.8	106	50.9
14	2	3	2008-01-09	8:45AM	2	2	69225054	2	4.85	29.44	109	55.3
14	2	3	2008-01-09	8:45AM	1	2	69225055	0.75	4.06	30.69	118	61.6
14	2	3	2008-01-09	9:20AM	2	2	69225056	1.5	4.23	29.33	109	55.7
14	2	3	2008-01-09	9:30AM	2	1	69225011	0.75	2.51	29.62	108	54.3
14	2	3	2008-01-09	10:00AM	2	2	69225012	0.5	4.8	29.78	106.5	51.9
14	2	3	2008-01-09	10:00AM	1	1	69225013	0.5	3.5	30.47	110	57.5
14	2	3	2008-01-09	10:00AM	1	1	69225014	0.5	4.24	30.75	120	61.5
15	3	3	2008-01-21	7:10AM	2	1	69225019	0.25	3.12	29.32	106	46.1
15	3	3	2008-01-21	7:10AM	1	1	69225020	0.25	4.08	31.05	113	59.7
15	3	3	2008-01-21	7:10AM	2	2	69225021	0.5	4.15	29.5	104.5	52.7
15	3	3	2008-01-21	7:10AM	2	1	69225022	0.25	2.92	28.59	106	48
15	3	3	2008-01-21	7:10AM	2	2	69225023	0.5	2.18	29.26	106	54.7
15	3	3	2008-02-09	7:05AM	2	2	69225030	1	5.21	30.68	108	54.3
15	3	3	2008-02-09	7:05AM	2	1	69225031	1.25	3.73	29.51	107	48
15	3	3	2008-02-09	7:05AM	2	1	69225032	0	4.44	30.6	108	52.4
15	3	3	2008-02-09	7:05AM	2	1	69225033	0.75	3.29	30.36	105	51.1
15	3	3	2008-02-16	7:20AM	2	1	69225038	0	4.64	30.76	112	51.3
15	3	3	2008-02-16	7:20AM	2	2	69225039	0.75	4.04	29.38	107	53.8
15	3	3	2008-02-16	7:20AM	2	1	69225040	0.25	4.87	29.4	109	51
15	3	3	2008-02-16	8:20AM	1	2	69225041	0.25	1.71	30.96	111	60
15	3	3	2008-02-16	8:20AM	2	1	69225042	0	4.67	29.22	106	50.6
15	3	3	2008-02-16	8:20AM	2	2	69225043	1	4.62	30.39	114	61.8
15	3	3	2008-02-16	7:20AM	2	2	69225045	0	5.73	29.47	110	52.1
15	3	3	2008-02-16	7:20AM	2	2	69225046	0.25	5.17	30.32	106	50.4
15	3	3	2008-02-16	7:20AM	2	1	69225047	0.25	4.38	28.46	102	50.5
15	3	3	2008-02-16	7:20AM	2	2	69225048	0.5	3.99	28.97	110	52.1
15	3	3	2008-02-16	7:20AM	2	1	69225049	0.25	4.71	29.64	108	48.7
15	3	3	2008-02-16	7:20AM	1	2	69225050	0.25	3.9	31.91	113	57
15	3	3	2008-02-16	7:20AM	1	2	69225061	0	2.54	32.32	111	55.6
15	3	3	2008-02-16	7:20AM	2	2	69225062	0.25	4.07	31.01	107	51
15	3	3	2008-02-16	8:20AM	2	1	69225044	0	5.62	29.08	107	48.6
