# Supplementary material for: Competition and Habitat Quality Influence Age and Sex Distribution in Wintering Rusty Blackbirds
Source: PLoS One. 2015 May 6;10(5):e0123775. doi: 10.1371/journal.pone.0123775 (PMC4422684; doi:10.1371/journal.pone.0123775)
Supplement: S2 Table — (XLS) [file pone.0123775.s002.xls]

## Sheet: PLOS_food_availability
Location	Habitat	Year	biomass_inv_mean	biomass_inv_wet	biomass_inv_dry	biomass_nut
1	3	4	0.323539	0.549628	0.0974497	0.48914
2	2	4	0.0065215	0	0.0130522	2.30508
6	2	4	0.00757525	0.0044355	0.010715	1.46742
9	3	4	0.247435	0.454495	0.0471124	0.661
10	3	4	0.590252	1.14835	0.0321636	1.61284
11	2	4	0.00216	0	0.00432029	2.24442
12	3	4	0.343168	0.657438	0.0289302	4.9575
13	1	4	0.00463429	0.00773143	0.0015376	9.58902
14	2	4	0.015386	0	0.030772	2.81058
16	1	4	0.0038096	0	0.0076192	8.09592
17	1	4	0.0563209	0	0.112623	7.36596
18	2	4	0.256079	0.489814	0.022344	7.41063
21	1	4	0.0082705	0	0.016541	3.85363
30	1	4	0.00169029	0.00313029	0.000250361	7.73094
1	3	5	0.561746	1.03579	0.087706	1.01133
2	2	5	0.141764	0.250579	0.0329496	7.64316
6	2	5	0.206814	0.356715	0.0569136	1.06421
9	3	5	0.199274	0.327009	0.0715392	0.11237
10	3	5	0.225754	0.397368	0.05414	1.59962
11	2	5	0.0908004	0.131298	0.0503024	4.72137
12	3	5	0.200329	0.250637	0.150021	5.76392
13	1	5	0.0468792	0.03348	0.0602784	48.3101
14	2	5	0.0580668	0.0175656	0.098568	2.35563
16	1	5	0.0243404	0.0176368	0.031044	39.1192
17	1	5	0.0187804	0.0144752	0.0230856	26.7431
18	2	5	0.218193	0.322712	0.113673	9.27087
20	2	5	1.84692	3.66399	0.0298608	7.72404
21	1	5	0.0054816	0	0.0109632	51.794
22	3	5	1.1447	2.16652	0.122872	0.82625
23	1	5	0.171854	0.341031	0.00267618	23.591
24	2	5	0.382984	0.625483	0.140485	3.90246
25	1	5	0.0064068	0.00326	0.0095536	25.4491
30	1	5	0.0179086	0.022618	0.0131992	20.4721
31	2	5	0.0489564	0.0453031	0.0463838	5.055
